# Supplementary material
Source: PubMed Central journal article supplement (PMC4801676)
Supplement: NIHMS731302-supplement-supplement_1.pdf [file NIHMS731302-supplement-supplement_1.pdf]

493

494

495 Supplemental Table 1: Adjuvant Therapy Based on Nodal Status

496

|                              | pN0<br>(N=33; 33%) | pN1<br>(N=6; 6.0%) | pN2<br>(N=61; 61%) | p       |
|------------------------------|--------------------|--------------------|--------------------|---------|
| Adjuvant Therapy             |                    |                    |                    |         |
| None                         | 22 (67%)           | 0 (0%)             | 17 (28%)           | <0.0001 |
| PORT only                    | 2 (6.1%)           | 5 (83%)            | 30 (49%)           |         |
| Adjuvant Chemotherapy only   | 8 (24%)            | 1 (17%)            | 7 (11%)            |         |
| PORT + Adjuvant Chemotherapy | 1 (3.0%)           | 0 (0%)             | 7 (11%)            |         |

497

|                      | pN0<br>(N=33; 33%) | pN1<br>(N=6; 6.0%) | pN2<br>(N=61; 61%) | p       |
|----------------------|--------------------|--------------------|--------------------|---------|
| Any Adjuvant Therapy |                    |                    |                    |         |
| No                   | 22 (67%)           | 0 (0%)             | 17 (28%)           | <0.0001 |
| Yes                  | 11 (33%)           | 6 (100%)           | 44 (72%)           |         |

498

499

500

501 PORT = post-operative radiation therapy.

502

503

504 Supplemental Table 2: Results of Post-Induction N2-Avidity in Detecting Pathological  
505 Mediastinal (N2-Persistent) disease.

|                              | Post-Induction PET N2-Status |                        |
|------------------------------|------------------------------|------------------------|
|                              | N2-Negative<br>(N=36; 47%)   | N2-Avid<br>(N=41; 53%) |
| Pathologic N2-Status         |                              |                        |
| N2-negative (N=31,<br>40%)   | 17 (47%)                     | 14 (34%)               |
| N2-persistent (N=46,<br>60%) | 19 (53%)                     | 27 (66%)               |

506 Total 77 with available post-induction PET and Pathologic N2 report.

507

508

509

510 Supplemental Table 3: Pre-induction and Post-induction PET N2-status for those with both pre-  
 511 and post-induction PET scans.\*

|                                       | Post-Induction PET N2-Status |                        |
|---------------------------------------|------------------------------|------------------------|
|                                       | N2-Negative<br>(N=36; 47%)   | N2-Avid<br>(N=41; 53%) |
| Pre-Induction PET N2-status<br>(N=73) |                              |                        |
| N2-Negative (N=6, 8%)                 | 5 (15%)                      | 1 (2.5%)               |
| N2-Avid (N=67, 92%)                   | 28 (85%)                     | 39 (98%)               |

512  
 513 \*N=73 patients had valid pre-induction and post-induction avidity reported on PET scans.

514  
 515  
 516  
 517  
 518  
 519  
 520  
 521

522 Supplemental Table 4: Univariable logistic regression models to investigate association between  
 523 factors and odds of pathologic N2-persistent disease.

| Variable                                                   | OR   | 95% CI      | P     |
|------------------------------------------------------------|------|-------------|-------|
| Post-induction PET<br>(N2-avid v N2-negative)              | 1.73 | 0.69, 4.33  | 0.2   |
| Age at Surgery                                             | 0.98 | 0.94, 1.03  | 0.4   |
| Male                                                       | 0.83 | 0.37, 1.86  | 0.6   |
| Smoking, yes                                               | 1.12 | 0.39, 3.23  | 0.8   |
| Pack-years >30, yes                                        | 0.77 | 0.34, 1.73  | 0.5   |
| Pulmonary comorbidity, yes                                 | 0.71 | 0.29, 1.73  | 0.4   |
| Cardiac comorbidity, yes                                   | 0.99 | 0.40, 2.45  | 1     |
| NIDDM, yes                                                 | 0.72 | 0.17, 3.14  | 0.7   |
| FEV1 (%)                                                   | 1.00 | 0.97, 1.03  | 1     |
| Diffusion (%)                                              | 1.00 | 0.98, 1.02  | 0.8   |
| Adenocarcinoma, yes                                        | 2.89 | 1.09, 7.63  | 0.032 |
| EGFR, present                                              | 0.91 | 0.21, 4.01  | 0.9   |
| KRAS, present                                              | 0.70 | 0.24, 2.08  | 0.5   |
| Type of mediastinal stage                                  |      |             |       |
| EBUS vs med-only                                           | 1.46 | 0.61, 3.50  | 0.4   |
| EBUS +med vs med-only                                      | 5.89 | 0.65, 53.11 | 0.11  |
| Others vs med-only                                         | 0.56 | 0.08, 3.79  | 0.6   |
| Pre-induction PET SUV <sub>max</sub> N > 6.5 <sup>a</sup>  | 1.66 | 0.68, 4.04  | 0.3   |
| Pre-induction PET SUV <sub>max</sub> T > 9.75 <sup>b</sup> | 0.67 | 0.29, 1.56  | 0.3   |
| Post-induction PET SUV <sub>max</sub> N > 3.3 <sup>c</sup> | 4.58 | 1.04, 20.24 | 0.045 |

|                                               |      |            |       |
|-----------------------------------------------|------|------------|-------|
| Post-induction PET SUVmax T> 5.0 <sup>d</sup> | 0.36 | 0.13, 0.98 | 0.046 |
|-----------------------------------------------|------|------------|-------|

- 524 a. The median of 86 numerical SUVmax N was 6.5; 43/86 had SUVmax N >6.5  
525 b. The median of 93 numerical SUVmax T was 9.75; 46/93 had SUVmax T >9.75  
526 c. The median of 41 numerical SUVmax N was 3.3; 18/41 had SUVmax N >3.3  
527 d. The median of 69 numerical SUVmax T was 5.0; 33/69 had SUVmax N >5.0  
528

529 PET = positron emission scan; NIDDM = non-insulin dependent diabetes; FEV1 = Forced  
530 expiratory volume in one second; EGFR = Endothelial growth factor receptor; KRAS = Kirsten  
531 rat sarcoma viral oncogene homolog; EBUS = endobronchial ultrasound; SUVmax = Maximum  
532 standardized uptake values.

533

534

535

536

537 Supplemental Table 5: Locations of Distant Recurrences

538

| <b><u>Location of Distance Metastases<sup>a</sup></u></b> |                      |
|-----------------------------------------------------------|----------------------|
| Single Distant Site                                       | 37 (67)              |
| Multiple Distant Sites                                    | 18 (33)              |
|                                                           |                      |
| Brain                                                     | 21 (38) <sup>b</sup> |
| Lung                                                      | 18 (33) <sup>b</sup> |
| Bone                                                      | 10 (18) <sup>b</sup> |
| Pleural                                                   | 6 (11) <sup>b</sup>  |
| Liver                                                     | 7 (13) <sup>b</sup>  |
| Adrenal                                                   | 1 (2) <sup>b</sup>   |
| Extra-Thoracic Lymph Nodes                                | 9 (16) <sup>b</sup>  |

<sup>a</sup>55 total patients with distant metastasis is denominator

<sup>b</sup>>100% because of multiple site recurrences

539

540

541 **FIGURE LEGENDS**

542 Figure 1. Overall survival (OS). A, Entire cohort: the 5-year OS was 39% (95% CI, 28%–56%).  
543 B, Postinduction PET N2 status: the 5-year OS for N2-negative was 43% (95% CI, 22%–83%)  
544 vs 39% (95% CI, 23%–64%) for N2-avid disease (p=0.251). C, Pathologic N2 status: the 5-year  
545 OS for N2-negative was 40% (95% CI, 25%–64%) vs 38% (95% CI, 21%–67%) for N2-  
546 persistent disease (p=0.936). D, Pathologic staging: the 5-year OS for <ypIIIA was 41% (95%  
547 CI, 25%–66%) vs 37% (95% CI, 21%–66%) for ≥ypIIIA (p = 0.791).

548  
549 Figure 2. Disease-free survival (DFS). A, Entire cohort: the 5-year DFS was 23% (95% CI,  
550 14%–37%). B, Postinduction PET N2 status: the 5-year DFS for N2-negative was 24% (95% CI,  
551 11%–51%) vs 24% (95% CI, 11%–54%) for N2-avid disease (p=0.867). C, Pathologic N2 status:  
552 the 5-year DFS for N2-negative was 34% (95% CI, 21%–56%) vs 9% (95% CI, 2%–45%) for  
553 N2-persistent disease (p=0.079). D, Pathologic staging: the 5-year DFS for <ypIIIA was 36%  
554 (95% CI, 22%–58%) vs 9% (95% CI, 2%–44%) for ≥ypIIIA (p=0.054).

555  
556  
557  
558  
559 Supplemental Figure 1. Cumulative incidence of recurrence (CIR). A, Entire cohort: the 5-year  
560 CIR was 70% (95% CI, 60%–81%). B, Postinduction PET N2 status: the 5-year CIR for N2-  
561 negative was 76% (95% CI, 58%–99%) vs 58% (95% CI, 41%–80%) for N2-avid disease  
562 (Gray's test, p=0.571). C, Pathologic N2 status: the 5-year CIR for N2-negative was 59% (95%  
563 CI, 44%–79%) vs 80% (95% CI, 66%–96%) for N2-persistent disease (Gray's test, p=0.077). D,  
564 Pathologic staging: the 5-year CIR for <ypIIIA was 57% (95% CI, 41%–78%) vs 80% (95% CI,  
565 67%–96%) for ≥ypIIIA (Gray's test, p=0.049).

**A**

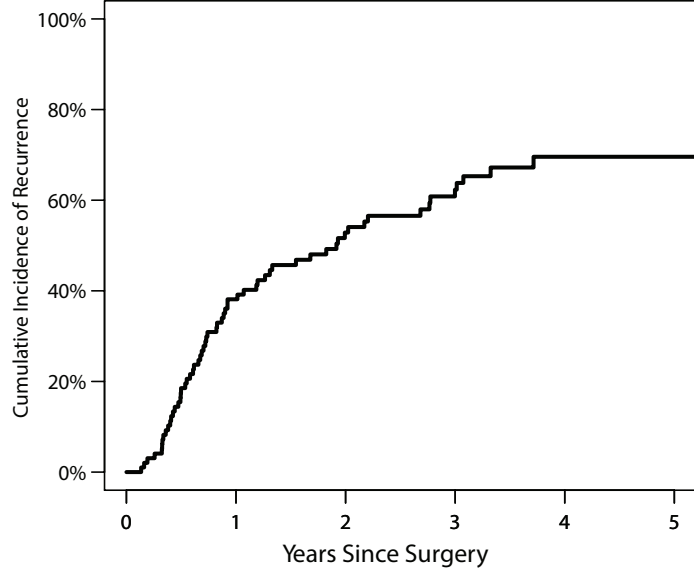

|             |     |         |         |         |         |         |
|-------------|-----|---------|---------|---------|---------|---------|
| No. At Risk | 100 | 58      | 37      | 24      | 10      | 7       |
| CIR (%)     | 0   | 38      | 53      | 62      | 70      | 70      |
| 95% CI      | –   | (30,49) | (44,64) | (53,74) | (60,81) | (60,81) |

**B**

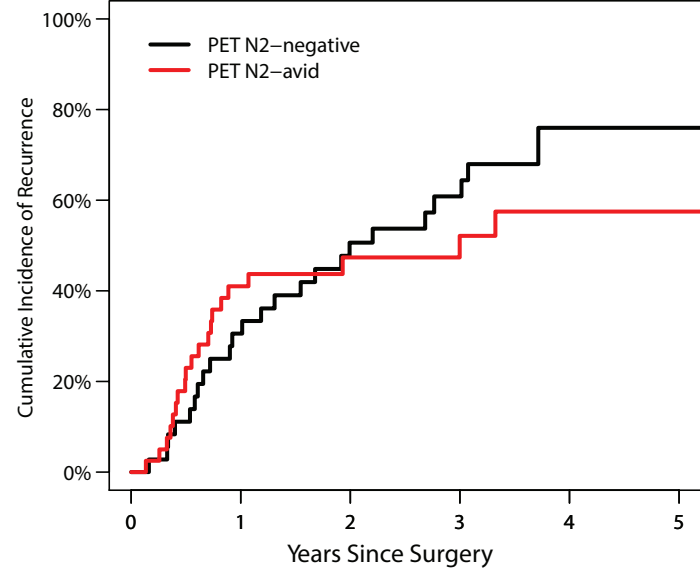

|                 |    |         |         |         |         |         |
|-----------------|----|---------|---------|---------|---------|---------|
| No. At Risk     |    |         |         |         |         |         |
| PET N2–negative | 36 | 25      | 17      | 11      | 3       | 2       |
| PET N2–avid     | 41 | 21      | 13      | 9       | 5       | 3       |
| CIR (%)         |    |         |         |         |         |         |
| PET N2–negative | 0  | 31      | 51      | 61      | 76      | 76      |
| PET N2–avid     | 0  | 41      | 47      | 52      | 57      | 57      |
| 95% CI          |    |         |         |         |         |         |
| PET N2–negative | –  | (18,50) | (36,71) | (46,81) | (58,99) | (58,99) |
| PET N2–avid     | –  | (28,60) | (33,67) | (37,73) | (41,80) | (41,80) |

**C**

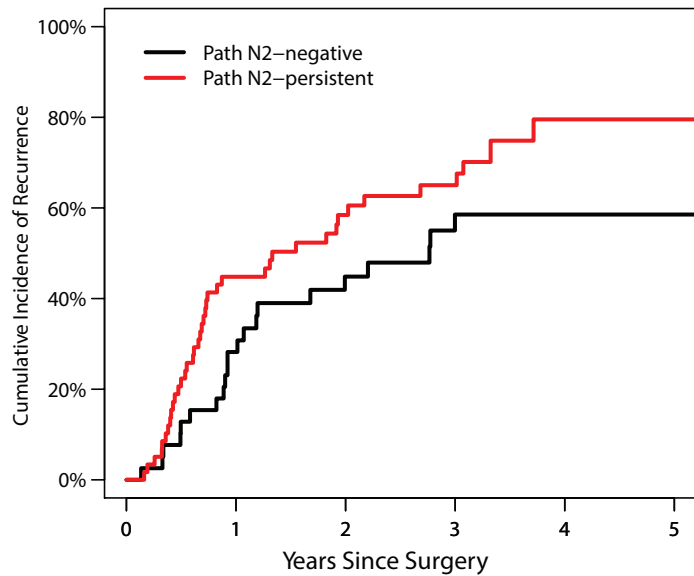

|                    |    |         |         |         |         |         |
|--------------------|----|---------|---------|---------|---------|---------|
| No. At Risk        |    |         |         |         |         |         |
| Path N2–negative   | 39 | 27      | 18      | 11      | 6       | 6       |
| Path N2–persistent | 61 | 31      | 19      | 13      | 4       | 1       |
| CIR (%)            |    |         |         |         |         |         |
| Path N2–negative   | 0  | 28      | 45      | 58      | 58      | 58      |
| Path N2–persistent | 0  | 45      | 58      | 65      | 80      | 80      |
| 95% CI             |    |         |         |         |         |         |
| Path N2–negative   | –  | (17,47) | (31,64) | (44,79) | (44,79) | (44,79) |
| Path N2–persistent | –  | (34,60) | (47,73) | (53,80) | (66,96) | (66,96) |

**D**

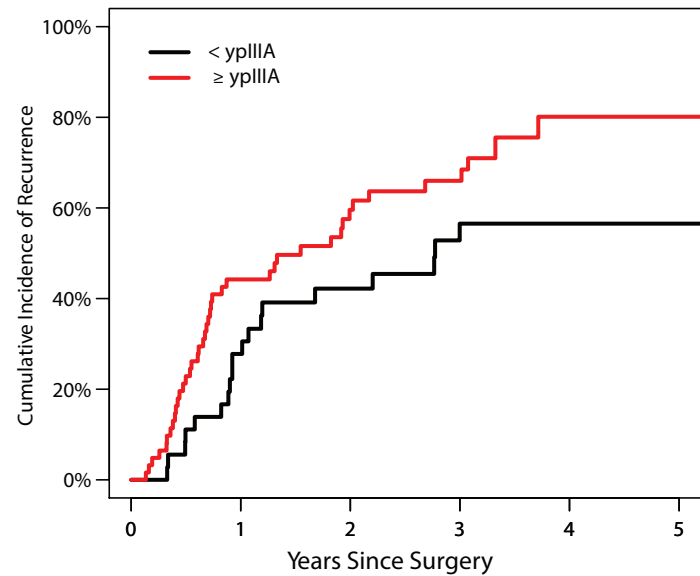

|             |    |         |         |         |         |         |
|-------------|----|---------|---------|---------|---------|---------|
| No. At Risk |    |         |         |         |         |         |
| < yplIIA    | 36 | 25      | 18      | 11      | 6       | 6       |
| ≥ yplIIA    | 64 | 33      | 19      | 13      | 4       | 1       |
| CIR (%)     |    |         |         |         |         |         |
| < yplIIA    | 0  | 28      | 42      | 56      | 56      | 56      |
| ≥ yplIIA    | 0  | 44      | 60      | 66      | 80      | 80      |
| 95% CI      |    |         |         |         |         |         |
| < yplIIA    | –  | (16,48) | (28,63) | (41,78) | (41,78) | (41,78) |
| ≥ yplIIA    | –  | (33,59) | (48,74) | (54,80) | (67,96) | (67,96) |
